# Supplementary material
Source: PubMed Central journal article supplement (PMC5033862)

## Supplemental information

### Attenuation of lung fibrosis in mice with clinically-relevant inhibitor of glutathione S-transferase pi

David H. McMillan<sup>1</sup>, Jos L. J. van der Velden<sup>1</sup>, Karolyn G. Lahue<sup>1</sup>, Xi Qian<sup>1</sup>, Robert W. Schneider<sup>1</sup>, Martina S. Iberg<sup>1</sup>, James D. Nolin<sup>1</sup>, Sarah Abdalla<sup>1</sup>, Dylan T. Casey<sup>1</sup>, Kenneth D. Tew<sup>2</sup>, Danyelle M. Townsend<sup>2</sup>, Colin J. Henderson<sup>3</sup>, C. Roland Wolf<sup>3</sup>, Kelly J. Butnor<sup>1</sup>, Douglas J. Taatjes<sup>1</sup>, Ralph C. Budd<sup>4</sup>, Charles G. Irvin<sup>4</sup>, Albert van der Vliet<sup>1</sup>, Stevenson Flemer<sup>5</sup>, Vikas Anathy<sup>1</sup>, and Yvonne M.W. Janssen-Heininger<sup>1</sup>

Department of Pathology and Laboratory Medicine<sup>1</sup>, University of Vermont, Burlington, VT.  
<sup>2</sup>Department of Cell and Molecular Pharmacology, Medical University of South Carolina, Charleston, SC. <sup>3</sup>Division of Cancer Research, The University of Dundee, Dundee, UK.  
Departments of Medicine<sup>4</sup> and Chemistry<sup>5</sup>, University of Vermont, Burlington, VT.

Address correspondence to:

Yvonne M.W. Janssen-Heininger, Ph.D.

Department of Pathology and Laboratory Medicine

University of Vermont Medical Center

149 Beaumont Avenue, HSRF 216A

Burlington, VT 05405

Phone: 802-656-0995

Fax: 802-656-8892

Email: [yvonne.janssen@uvm.edu](mailto:yvonne.janssen@uvm.edu)

The authors have stated that no conflicts of interest exist

## **Methods:**

### **RT-qPCR:**

Total RNA was extracted from mouse lungs with a QIAshredder and a RNeasy Mini kit according to the manufacturer's instructions (79656 and 74106; Qiagen, Valencia, CA). Total RNA concentrations were determined with a NanoDrop 1000 spectrophotometer (Thermo Fisher Scientific). cDNA was generated with the M-MLV reverse transcriptase system (M1701; Promega) and quantified via real-time PCR with SYBR® Select master mix (4472908; Applied Biosystems, Foster City, CA) and a C1000™ Thermal Cycler with a CFX96™ real-time PCR detection system (Bio-Rad, Hercules, CA). Primers were obtained from Integrated DNA Technologies (GSTP1 Fw: AGCAGGCATGCCACCATA, *Gstp1* Rv: GCTGCCCATACAGACAAGTG, *Col1a1* Fw: CACCCTCAAGAGCCTGAGTC, *Col1a1* Rv: AGACGGCTGAGTAGGGAACA, *Col5a1* Fw: GGTCCCTGACACACCTCAGT, *Col5a1* Rv: TGCTCCTCAGGAACCTCTGT, *Fn1* Fw: AATGGAAAAGGGGAATGGAC, *Fn1* Rv: CTCGGTTGTCCTTCTTGCTC, *Fsp1* Fw:AGGAGCTACTGACCAGGGAGCT, *Fsp1* Rv: TCATTGTCCCTGTTGCTGTCC).

### **Supplemental Figure Legends:**

**Figure S1** – Confirmation of GSTP absence in *Gstp*<sup>-/-</sup> mouse lungs. A) Detection of GSTP expression in untreated wild-type and *Gstp*<sup>-/-</sup> mouse lung homogenates by Western blot (3 per group). B) Detection of *Gstp1* mRNA expression by RT-qPCR. \*p<0.05 by two-tailed unpaired Student's t-test, n = 4 per group. GSTP: Glutathione S Transferase P.

**Figure S2** – *Gstp* deficiency attenuates collagen content and fibrotic remodeling 28 days post-bleomycin. Wild-type and *Gstp*<sup>-/-</sup> mice were treated with bleomycin for 28 days as previously indicated. A-B) Assessment of hydroxyproline and soluble collagen content. \*p<0.05 relative to PBS group, †p<0.05 relative to respective wild-type group by two-way ANOVA with a Tukey posttest (n = 4-6 per group). C) Assessment of fibrotic remodeling by Masson's trichrome staining 15 days post-bleomycin administration. Scale bar = 100 μm. GSTP: Glutathione S Transferase P.

**Figure S3** – GSTP deficiency attenuates bleomycin- and AdTGFβ-induced fibrotic marker expression in mouse lungs. Wild-type and *Gstp*<sup>-/-</sup> mice were treated with either bleomycin for 15 days (A) or AdTGFβ for 21 days (B). A) Measurement of bleomycin-induced *Col1a1*, *Col5a1*, *Fsp1* and *Fn1* mRNA expression in wild-type and *Gstp*<sup>-/-</sup> mouse lungs by RT-qPCR. B) Measurement of AdTGFβ-induced *Col1a1* mRNA expression in wild-type and *Gstp*<sup>-/-</sup> mouse

lungs by RT-qPCR. Shown are pooled data from two independent experiments. \* $p < 0.05$  relative to PBS/AdCtrl group, † $p < 0.05$  relative to respective wild-type group by two-way ANOVA with a Tukey posttest (n = 6-11 per group). GSTP: glutathione S-transferase P, AdCtrl: control adenovirus, AdTGF $\beta$ : Adenovirus expressing recombinant active transforming growth factor beta-1, *Col1a1*: collagen type 1A1, *Col5a1*: collagen type 5A1, *Fsp1*: fibroblast-specific protein 1, *: fibronectin.*

**Figure S4** – Confirmation of FAS reconstitution in *lpr* fibroblasts. Detection of FAS in *lpr* fibroblasts following transfection with either wild-type (WT) or C294A FAS by Western blot. Lpr: *Fas*-deficient, Fib: fibroblasts.

Supplemental figure 1

**A**

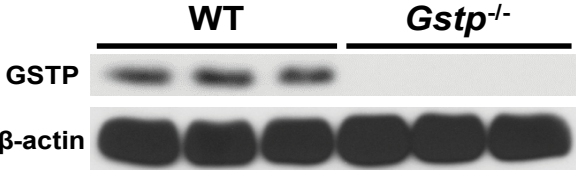

**B**

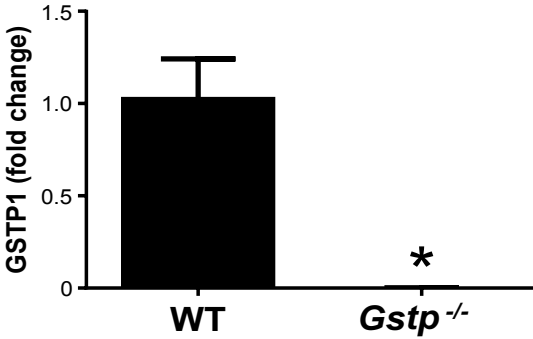

Supplemental figure 2

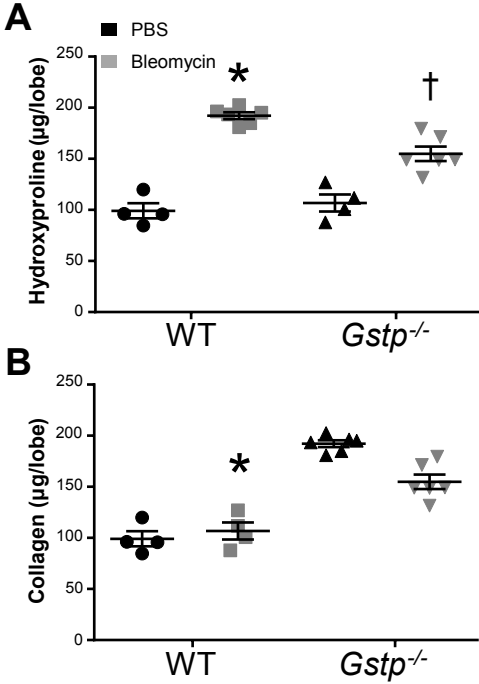

### Supplemental figure 3

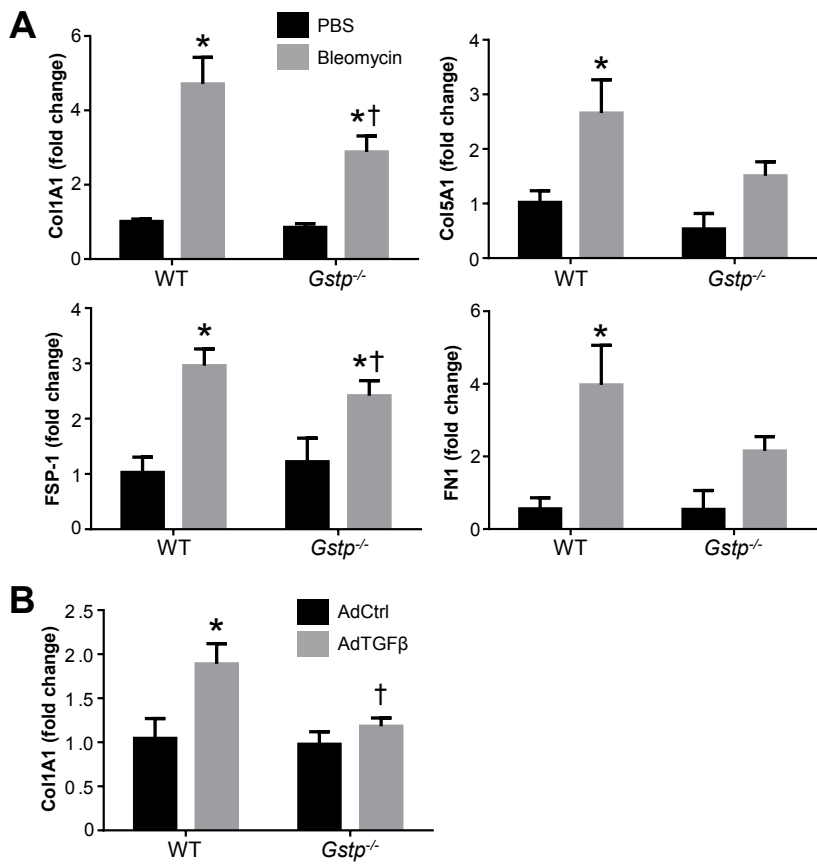

Supplemental figure 4

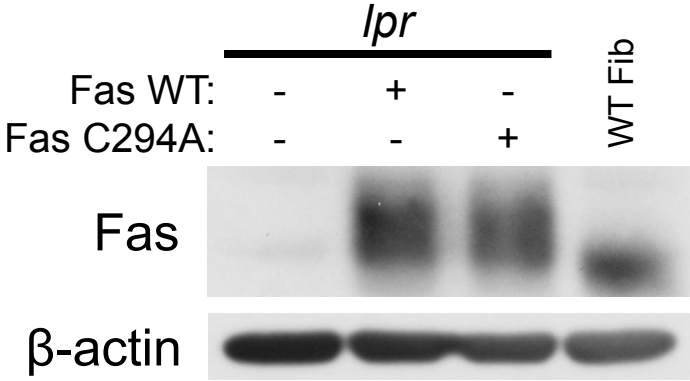

Supplement: jciinsight-1-85717-s001.pdf [file jciinsight-1-85717-s001.pdf]
